# Supplementary material
Source: PubMed Central journal article supplement (PMC8569367)
Supplement: ajcr0011-4956-f3.pdf [file ajcr0011-4956-f3.pdf]

## Predictors of complete response at first TACE

**Supplementary Table 1.** Cox regression of risk factors associated with early recurrence after first TACE

| Predictor Variables                                  | Univariate |             |         | Multivariate |             |         |
|------------------------------------------------------|------------|-------------|---------|--------------|-------------|---------|
|                                                      | HR         | 95% CI      | P value | HR           | 95% CI      | P value |
| Age (per year increase)                              | 1.001      | 0.973-1.029 | 0.947   |              |             |         |
| Male (vs. female)                                    | 0.791      | 0.398-1.575 | 0.791   |              |             |         |
| Body weight loss (vs. no)                            | 0.658      | 0.159-2.723 | 0.563   |              |             |         |
| Viral infection (vs. non-viral)                      | 1.983      | 0.613-6.418 | 0.253   |              |             |         |
| DM (vs. no)                                          | 0.784      | 0.394-1.560 | 0.488   |              |             |         |
| CTP class B (vs. A)                                  | 1.124      | 0.473-2.667 | 0.791   |              |             |         |
| Beyond up-to-7 criteria (vs. within)                 | 1.606      | 0.631-4.088 | 0.320   |              |             |         |
| Bilobar tumor extent (vs. unilobar)                  | 1.268      | 0.607-2.650 | 0.528   |              |             |         |
| Macrovascular invasion (vs. no)                      | 3.627      | 1.605-8.196 | 0.002   | 3.113        | 1.368-7.085 | 0.001   |
| AAR $\geq$ 1.7 (vs. <1.7)                            | 0.604      | 0.228-1.793 | 0.396   |              |             |         |
| AFP $\geq$ 15 ng/ml (vs. <15 ng/ml)                  | 2.788      | 1.400-5.551 | 0.004   | 2.601        | 1.300-4.204 | 0.007   |
| Platelet $\geq$ 150 K/ $\mu$ L (vs. <150 K/ $\mu$ L) | 0.557      | 0.235-1.422 | 0.184   |              |             |         |
| Fever after 1 <sup>st</sup> TACE (vs. no)            | 0.640      | 0.270-1.519 | 0.311   |              |             |         |

Abbreviations: AAR, aspartate aminotransferase to alanine aminotransferase ratio; AFP, alpha-fetoprotein; CTP, Child-Turcotte-Pugh; DM, diabetes mellitus; TACE, transarterial chemoembolization.

**Supplementary Table 2.** Cox regression of risk factors associated with late recurrence after first TACE

| Predictor Variables                                  | Univariate |             |         |
|------------------------------------------------------|------------|-------------|---------|
|                                                      | HR         | 95% CI      | P value |
| Age (per year increase)                              | 0.997      | 0.973-1.022 | 0.841   |
| Male (vs. female)                                    | 1.257      | 0.711-2.223 | 0.432   |
| Body weight loss (vs. no)                            | 0.792      | 0.247-2.548 | 0.721   |
| Viral infection (vs. non-viral)                      | 1.380      | 0.588-3.238 | 0.460   |
| DM (vs. no)                                          | 2.166      | 1.243-3.774 | 0.006   |
| CTP class B (vs. A)                                  | 0.544      | 0.196-1.511 | 0.243   |
| Beyond up-to-7 criteria (vs. within)                 | 1.274      | 0.456-3.563 | 0.644   |
| Bilobar tumor extent (vs. unilobar)                  | 1.512      | 0.756-3.024 | 0.242   |
| Macrovascular invasion (vs. no)                      | 0.619      | 0.085-4.501 | 0.636   |
| AAR $\geq$ 1.7 (vs. <1.7)                            | 0.778      | 0.332-1.836 | 0.564   |
| AFP $\geq$ 15 ng/ml (vs. <15 ng/ml)                  | 1.244      | 0.718-2.157 | 0.436   |
| Platelet $\geq$ 150 K/ $\mu$ L (vs. <150 K/ $\mu$ L) | 0.992      | 0.527-1.867 | 0.979   |
| Fever after 1 <sup>st</sup> TACE (vs. no)            | 0.675      | 0.342-1.333 | 0.258   |

Abbreviations: AAR, aspartate aminotransferase to alanine aminotransferase ratio; AFP, alpha-fetoprotein; CTP, Child-Turcotte-Pugh; DM, diabetes mellitus; TACE, transarterial chemoembolization.
